# Supplementary material for: Developing a genetic manipulation system for the Antarctic archaeon, Halorubrum lacusprofundi: investigating acetamidase gene function
Source: PubMed Central journal article supplement (PMC5052560; doi:10.1038/srep34639), 2016-10-06
Supplement: srep34639-s1.pdf [file srep34639-s1.pdf]

1 **Developing a genetic manipulation system for the Antarctic archaeon, *Halorubrum***  
2 ***lacusprofundi*: investigating acetamidase gene function**

3

4 **Yan Liao, Timothy J. Williams, James C. Walsh, Muyan Ji, Anne Poljak, Paul M.G.**  
5 **Curmi, Iain G. Duggin and Ricardo Cavicchioli**

6

7

### **Supplementary Information**

8

9 **Transformation protocol**

10 **Figures S1 – 11**

11 **Tables S1 – S4 (note Table S2 and S4 are provided separately as excel files)**

## 12 ***Halorubrum lacusprofundi* transformation protocol**

13 The protocol is provided as a laboratory procedure explaining the steps performed each day of  
14 the experiment. Recipes for media and solutions are provided at the end of the procedure.

15

16 Plate out the *Hrr. lacusprofundi* ACAM34 strain on ADLVB solid medium and inoculate a  
17 single colony into 10 mL of ADLVB media. Incubate at 30°C (shaking, 120 rpm) for about 5  
18 d (when the culture is turbid) and use 500 µL of this as an inoculum for a 50 mL culture in a  
19 250 mL flask. Grow for approximately one more week (~ 7-10 d, shaking, 120 rpm) to  
20 provide a late exponential culture (quite turbid, and has a pink color, OD<sub>600</sub> ~ 0.8).

21

### 22 **Day 1**

- 23 1. Ensure adequate quantities of transformation solutions are present (i.e. buffered and  
24 unbuffered spheroplasting solutions, spheroplast dilution solution and regeneration solution)
- 25 2. Leave PEG<sub>600</sub> at RT to thaw overnight. Warm to 30°C if necessary.

26

### 27 **Day 2**

- 28 3. When the culture reaches OD<sub>600</sub> ~0.8 (see above), pellet 10 mL by centrifuging at 5000  
29 rpm for 20 min at 25°C. All subsequent steps are performed at room temperature unless  
30 otherwise stated.
- 31 4. Resuspend pellet gently in 2 mL of buffered spheroplasting solution. Transfer to 2 ml  
32 round-bottomed tube and pellet cells at 6000 rpm, 8 min at 25°C.
- 33 5. Very gently, resuspend in 200 µL of buffered spheroplasting solution (for each  
34 transformation reaction). Avoid generating air bubbles.
- 35 6. For each transformation, transfer 200 µL cells to a clean 2 ml round-bottomed tube. Add 20  
36 µl of 0.5 M EDTA pH 8.0 onto the side of the tube, and invert to mix. Leave at RT for 10 min  
37 to form spheroplasts.
- 38 7. Meanwhile set up DNA samples in 30 µL total volumes:
  - 39 10 µl of unmethylated DNA (~1 µg, ultra-pure, prepared from *E. coli* c2925 strain) in  
40 DNase, RNase and protease-free water.
  - 41 15 µl of unbuffered spheroplasting solution.
  - 42 5 µl of 0.5 M EDTA pH 8.0.
- 43 8. Add the DNA samples (step 7) to the tubes containing the spheroplasts (step 6) to  
44 commence the transformation process.

- 45 9. After 5 min, add 250  $\mu$ L (equal volume) of 60% PEG<sub>600</sub> to each transformation tube. Add  
46 in same manner as EDTA (step 6), but shake the tube horizontally ~10 times to gently mix the  
47 solution. Leave at RT for 30 min.
- 48 10. Add 1.5 mL spheroplast dilution solution to each transformation tube, invert to mix and  
49 leave at RT for 2 min. Pellet using a microfuge at 12,000 rpm for 10 min at 25°C, and remove  
50 the supernatant.
- 51 11. Add 1 mL regeneration solution, resuspend the pellet gently until a homogeneous solution  
52 is obtained. Return to 30 °C for 4 h to regenerate cell walls (shaking, 120 rpm).
- 53 12. Pellet using a microfuge at 12,000 rpm for 10 min at 25°C. Remove supernatant and  
54 resuspend gently in 1 mL transformation dilution solution.
- 55 13. Plate 100  $\mu$ L on ADLVB or ADLVB + antibiotic (selective) plates.
- 56 14. Incubate plates at 30 °C in sealed plastic bags for about 15 d. Place wet tissue into the bag  
57 to avoid media dehydration and salt crystallization. Check the plates every 3 d, and carefully  
58 remove condensation that has formed on the lid.

59

#### 60 **Artificial Deep Lake Vitamin succinate Broth (ADLVSb) media (1L)**

- |                                                                                         |                 |
|-----------------------------------------------------------------------------------------|-----------------|
| 61 NaCl                                                                                 | 180.0 g,        |
| 62 MgCl <sub>2</sub> .6H <sub>2</sub> O                                                 | 75.0 g,         |
| 63 Sodium succinate                                                                     | 10.0 g (Sigma), |
| 64 MgSO <sub>4</sub> .7H <sub>2</sub> O                                                 | 7.4 g,          |
| 65 KCl                                                                                  | 7.4 g,          |
| 66 CaCl <sub>2</sub> .2H <sub>2</sub> O                                                 | 1.0 g (Sigma),  |
| 67 Yeast Extract                                                                        | 1.0 g (Oxoid);  |
| 68 10 mL Vitamin solution containing per litre: Biotin 30.0 mg, Cyanocobalamin 20.0 mg, |                 |
| 69 Thiamine- HCl 10.0 mg.                                                               |                 |

70

- 71 Adjust basal medium pH to  $7.2 \pm 0.2$ , and autoclave for 15 min at 15 psi and 121 °C. Filter  
72 sterilize vitamin solution and add to basal medium after autoclaving.

73

#### 74 **Pravastatin stock**

- 75 5 mg ml<sup>-1</sup> in pure water

76

#### 77 **30% BSW (buffered salt water) (1L)**

- |         |        |
|---------|--------|
| 78 NaCl | 260 g, |
|---------|--------|

79 MgCl<sub>2</sub>.6H<sub>2</sub>O 10 g,  
80 MgSO<sub>4</sub>.7H<sub>2</sub>O 35 g,  
81 KCl 7 g,  
82 1 M Tris-HCl, pH7.4 20 mL  
83 Dissolve completely in ~800 mL Milli-Q water, and then bring volume to 995 mL. Autoclave.  
84 Add 5 mL sterile 1M CaCl<sub>2</sub>.

85

86 **10X YPC (100 mL)**

87 Yeast extract 5 g  
88 Oxoid peptone (not Difco Bacto) 1 g  
89 Casamino acid 1 g  
90 Dissolve in Milli-Q water and then bring pH to 7.4 with 2M KOH and the volume to 100 mL.  
91 Use freshly or store in the fridge for a maximum of a few days.

92

93 **Buffered Spheroplasting Solution**

94 NaCl 5.844 g (1M)  
95 KCl 0.2 g (27 mM)  
96 1M Tris.HCl pH8.5 5 ml (50 mM)  
97 Sucrose 15 g (15%)  
98 dH<sub>2</sub>O to 100 mL

99 Filter sterilize

100

101 **Unbuffered Spheroplasting Solution**

102 NaCl 5.844 g (1M)  
103 KCl 0.2 g (27 mM)  
104 Sucrose 15 g (15%)  
105 dH<sub>2</sub>O to 100 mL

106 Adjust to pH 7.5 (~ 10 µl 1 M NaOH). Filter sterilize

107

108 **Spheroplast Dilution Solution**

109 30% BSW 76.7 ml (23%)  
110 Sucrose 15 g (15%)  
111 0.5 M CaCl<sub>2</sub> 0.75 ml (3.75 mM)  
112 dH<sub>2</sub>O to 100 mL

113 Filter sterilize

114

115 **Regeneration Solution**

116 30% BSW                    192 mL (23%)

117 10X YPC                    25 mL (1X)

118 Sucrose                    37.5 g (15%)

119 dH<sub>2</sub>O                    to 250 mL

120 Filter sterilize

121

122 **Transformant Dillution Solution**

123 30% SW                    192 mL (23%)

124 Sucrose                    37.5 g (15%)

125 dH<sub>2</sub>O                    to 250 mL

126 Filter sterilize

127

128 **Agar plates:** After autoclaving the media, allow to cool to ~ 60 °C with stirring before  
129 adding components. Add the corresponding volume of pravastatin stock to make the final  
130 concentration required for each plate.

**Figure S1. Growth of pJWID1 transformed and non-transformed *Hrr. lacusprofundi* in the presence of pravastatin.** Transformed and non-transformed cells exhibited a large difference in their ability to grow on pravastatin containing solid media. Transformation was effective when selecting on plates using  $2.5 \mu\text{g mL}^{-1}$  pravastatin. Growth assessments were semi-quantitative: +++, > 100 colonies; ++,  $\leq 100$  colonies; +,  $\leq 50$  colonies; -,  $\leq 10$  colonies; -, no visible growth; nd, not determined.

Figure S1

| Type       | Pravastatin concentration $\mu\text{g mL}^{-1}$ |      |     |      |      |     |     |    |    |    |
|------------|-------------------------------------------------|------|-----|------|------|-----|-----|----|----|----|
|            | 0                                               | 0.05 | 0.5 | 1    | 2.5  | 5   | 7.5 | 10 | 15 | 20 |
| WTpJWID1   | ++++                                            | nd   | nd  | ++++ | ++++ | +++ | ++  | +  | +  | +  |
| WT_control | ++++                                            | ++++ | +   | +    | -    | -   | -   | -  | -  | -  |

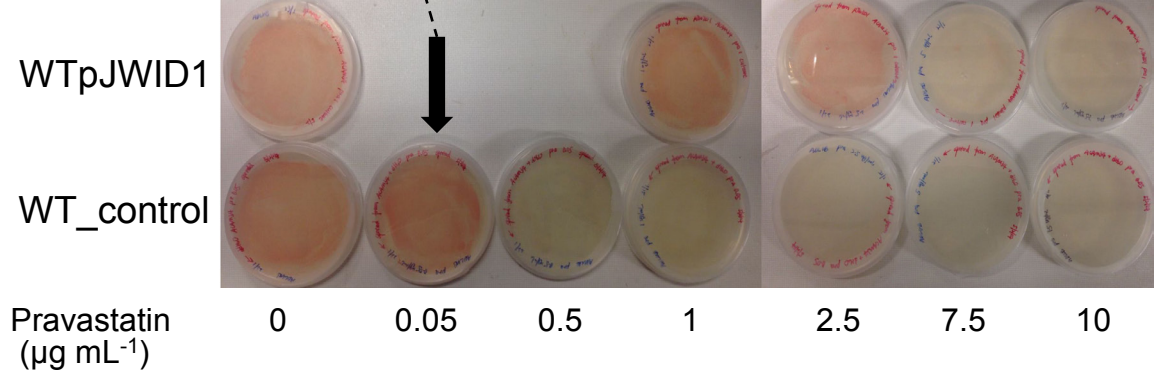

**Figure S2. Effect of plasmid concentration on transformation efficiency of pJWID1 in *Hrr. lacusprofundi*.** The transformation efficiency was calculated using different concentrations of plasmid, performing a dilution series and counting colonies only on plates containing 30 – 300 colonies, and expressing transformation efficiency as the number of transformants per  $\mu\text{g}$  of pJWID1 DNA. Pravastatin was used for selection of transformants at a concentration of  $2.5 \mu\text{g mL}^{-1}$ .



# Figure S2

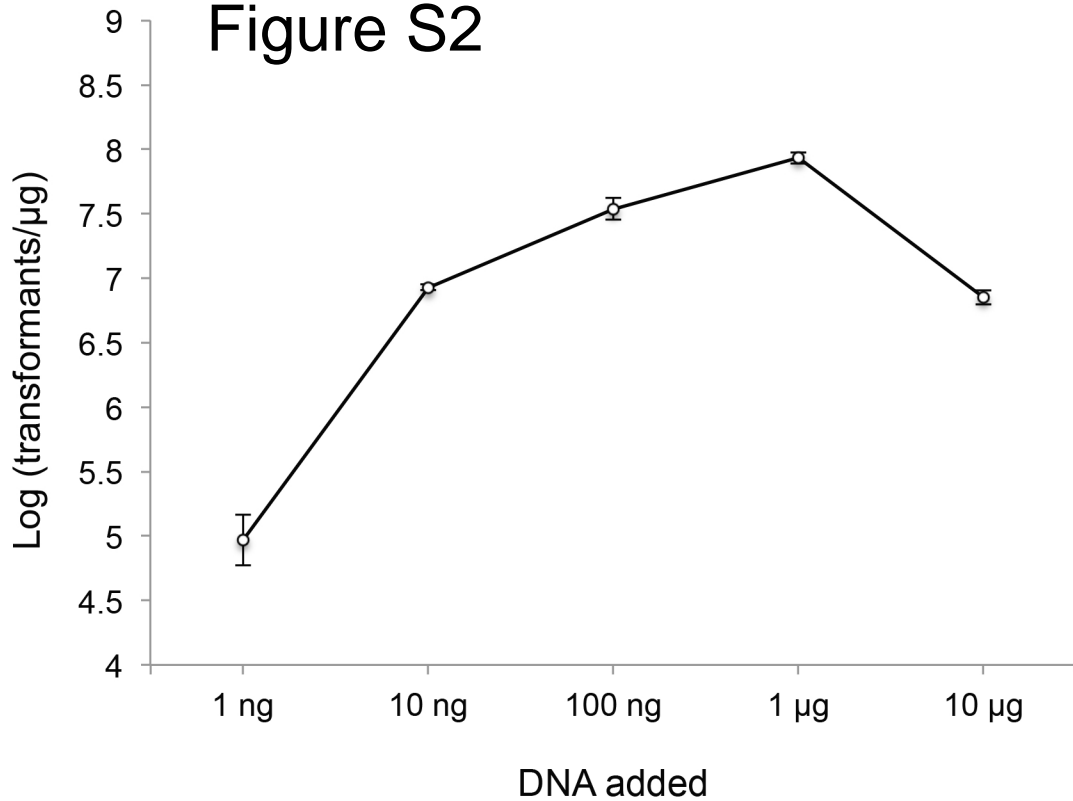

**Figure S3. Stability of pJWID1 in *Hrr. lacusprofundi*.** A. The plasmid pJWID1 remained stable in transformed cells if selection pressure ( $2.5 \mu\text{g mL}^{-1}$ ) was maintained. Plates show the pravastatin resistance ( $2.5 \mu\text{g mL}^{-1}$ ) of colonies after cultures were grown in the presence of pravastatin ( $2.5 \mu\text{g mL}^{-1}$ ). B. The plasmid pJWID1 was not maintained in *Hrr. lacusprofundi* without pravastatin selection. Plates show all colonies grown in media lacking pravastatin were unable to grow when subcultured on pravastatin ( $2.5 \mu\text{g mL}^{-1}$ ) containing media. C. Wild-type *Hrr. lacusprofundi* cells were not resistant to pravastatin ( $2.5 \mu\text{g mL}^{-1}$ ). As a control wild-type cells not harboring the plasmid only grew on plates that did not contain pravastatin.

Figure S3

A. with selection pressure (WTpJWID1)

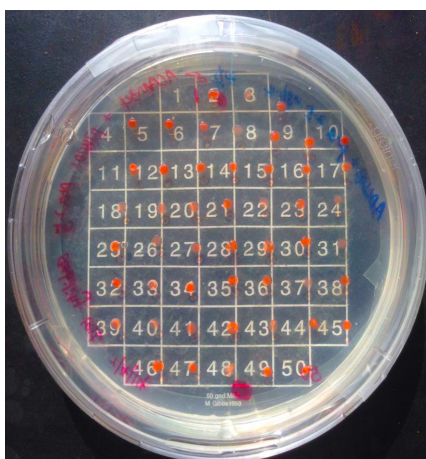

+ 2.5 µg mL<sup>-1</sup> pravastatin

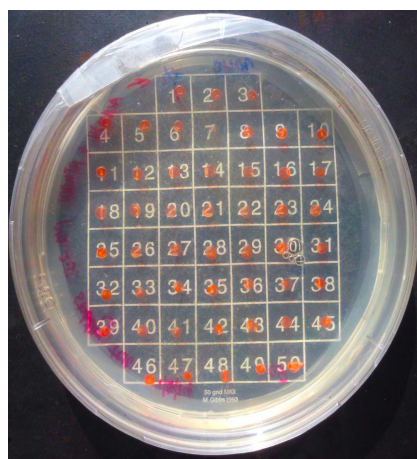

- pravastatin

B. without selection pressure (WTpJWID1)

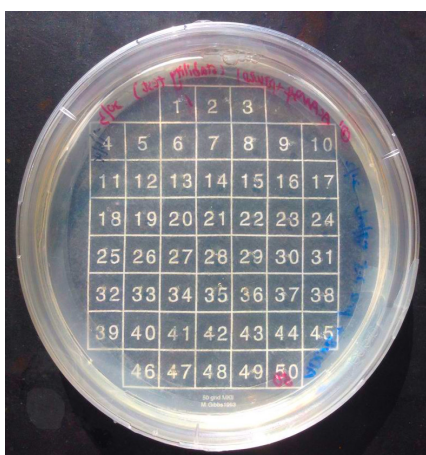

+ 2.5 µg mL<sup>-1</sup> pravastatin

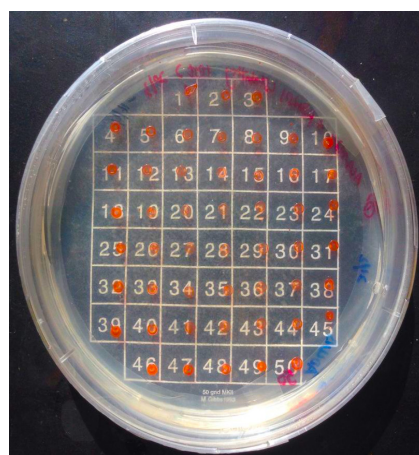

- pravastatin

C. negative control WT

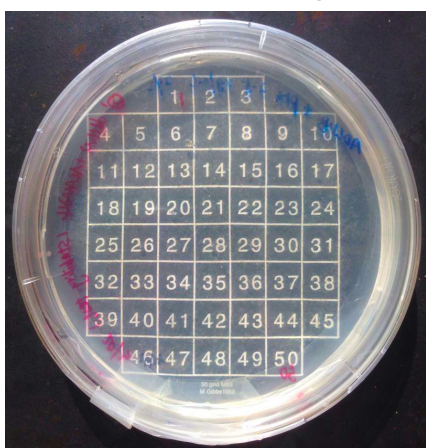

+ 2.5 µg mL<sup>-1</sup> pravastatin

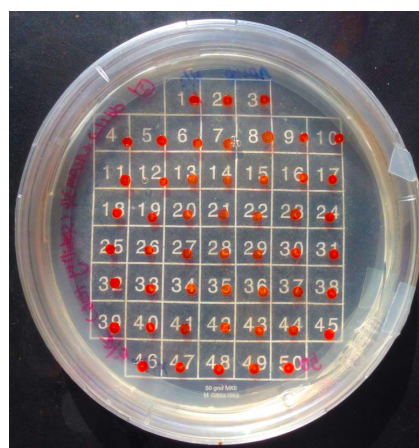

- pravastatin

**Figure S4. Microscopy assessment of *Hrr. lacusprofundi* cells harboring plasmid pJWID1 following tryptophan induction of GFP expression.** With tryptophan induction, particularly at the highest concentration tested (3 mM), fluorescence microscopy revealed fluorescing *Hrr. lacusprofundi* transformed cells. Bright field images provided for comparison. The bar represents 50  $\mu\text{m}$ .

Figure S4

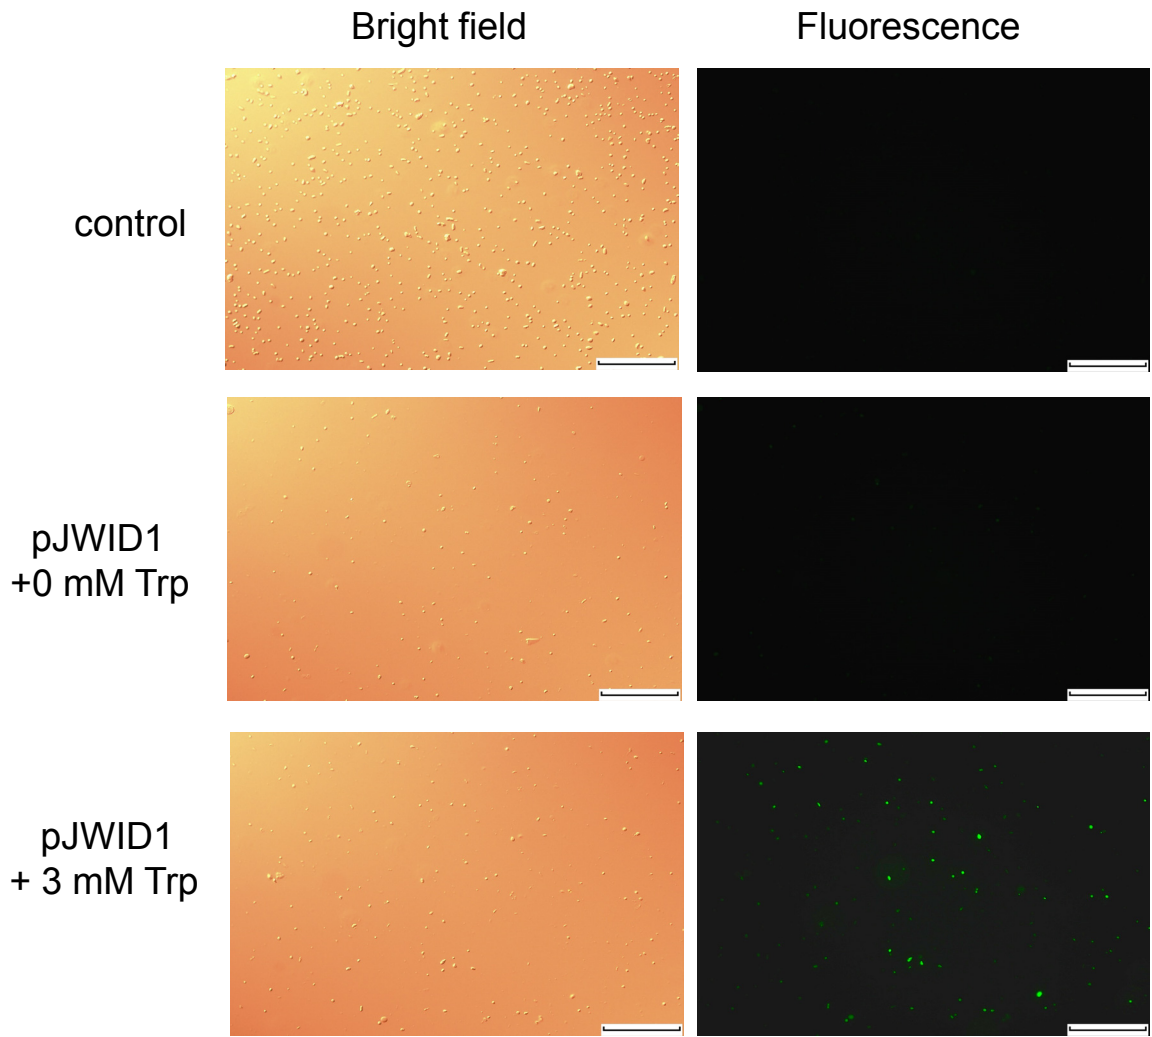

**Figure S5. PCR assessment of recombination events in *Hrr. lacusprofundi* during the construction of the *amd3* gene disruption.** Pravastatin resistant colonies amplified by PCR using primers: P1 (upper panel), P2 (lower panel). Lane M, 1 kb DNA ladder; Lane N, no DNA (negative control); Lane WT, untransformed *Hrr. lacusprofundi*; Lane C1-C10, randomly picked transformed colonies. Both C1 and C2 failed to show a band with P1 and P2 primers, consistent with them arising from a double recombination event (also see Fig. 3).

Figure S5

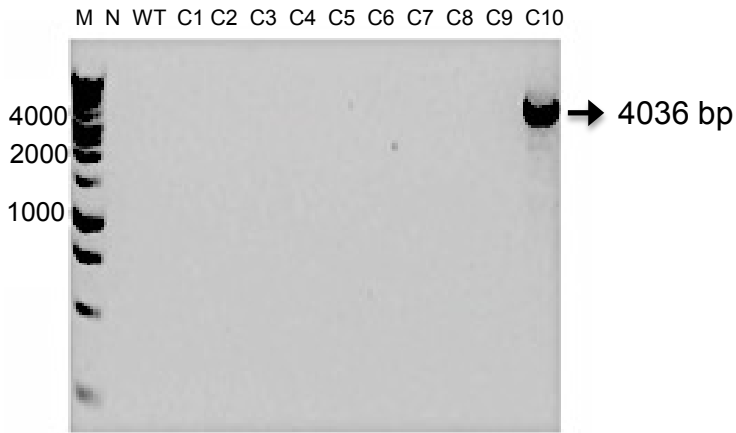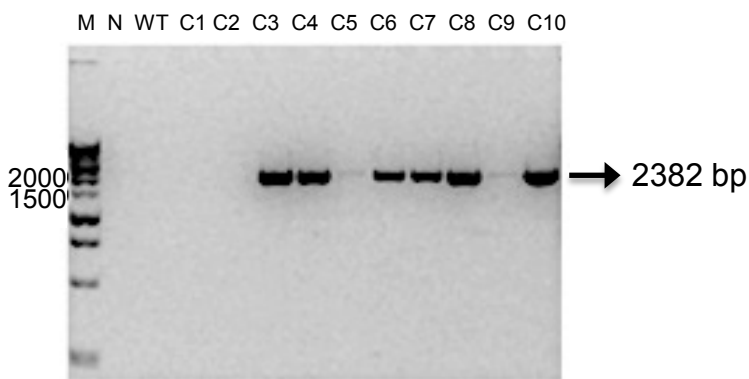

**Figure S6.** GFP expression in *Hrr. lacusprofundi* wild-type harboring pJWID1 or pJWID1\_aml3. Fluorescence was measured after 3, 5 and 7 d: pJWID1, 0 mM tryptophan (horizontal stripes); pJWID1, 3 mM tryptophan (solid grey); pJWID1\_aml3, 0 mM tryptophan (white); pJWID1\_aml3, 3 mM tryptophan (black). The plasmids were maintained using 2.5  $\mu\text{g mL}^{-1}$  pravastatin. Fluorescence from pJWID1\_aml3 was lower than pJWID1. Error bars represent standard error of three replicate cultures.



# Figure S6

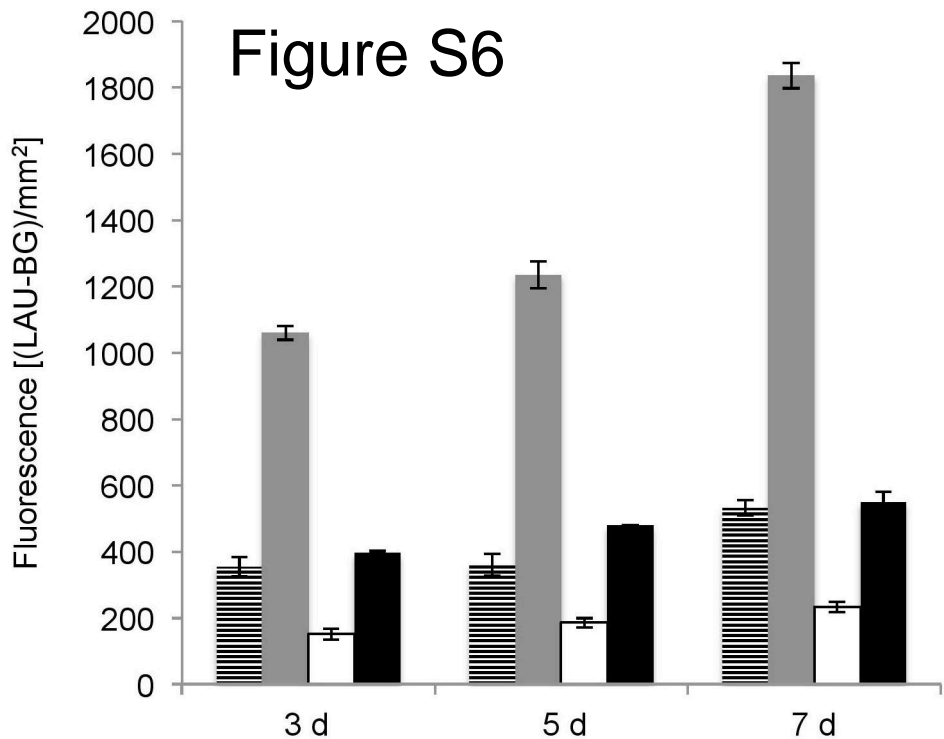

**Figure S7. Number of Amd/Fmd sequences within OUT0.9 clusters for *Archaea* and *Bacteria*. A. *Archaea*; B. *Bacteria*.**

Figure S7

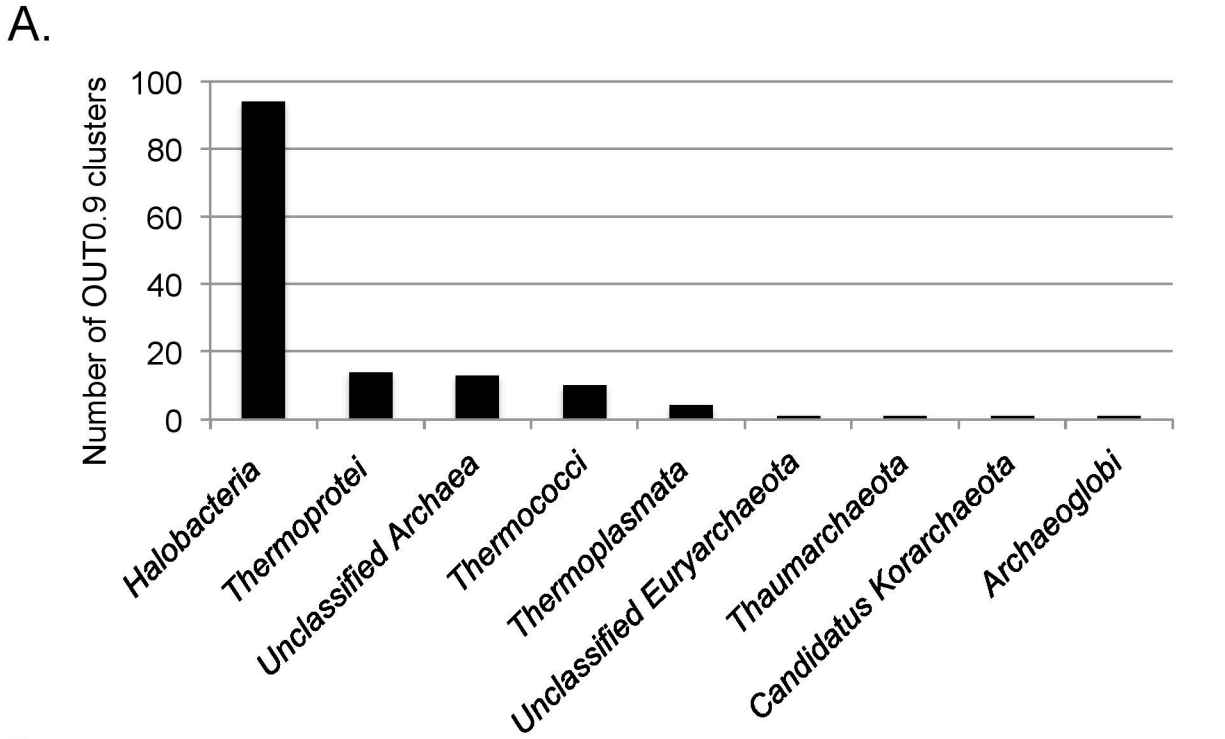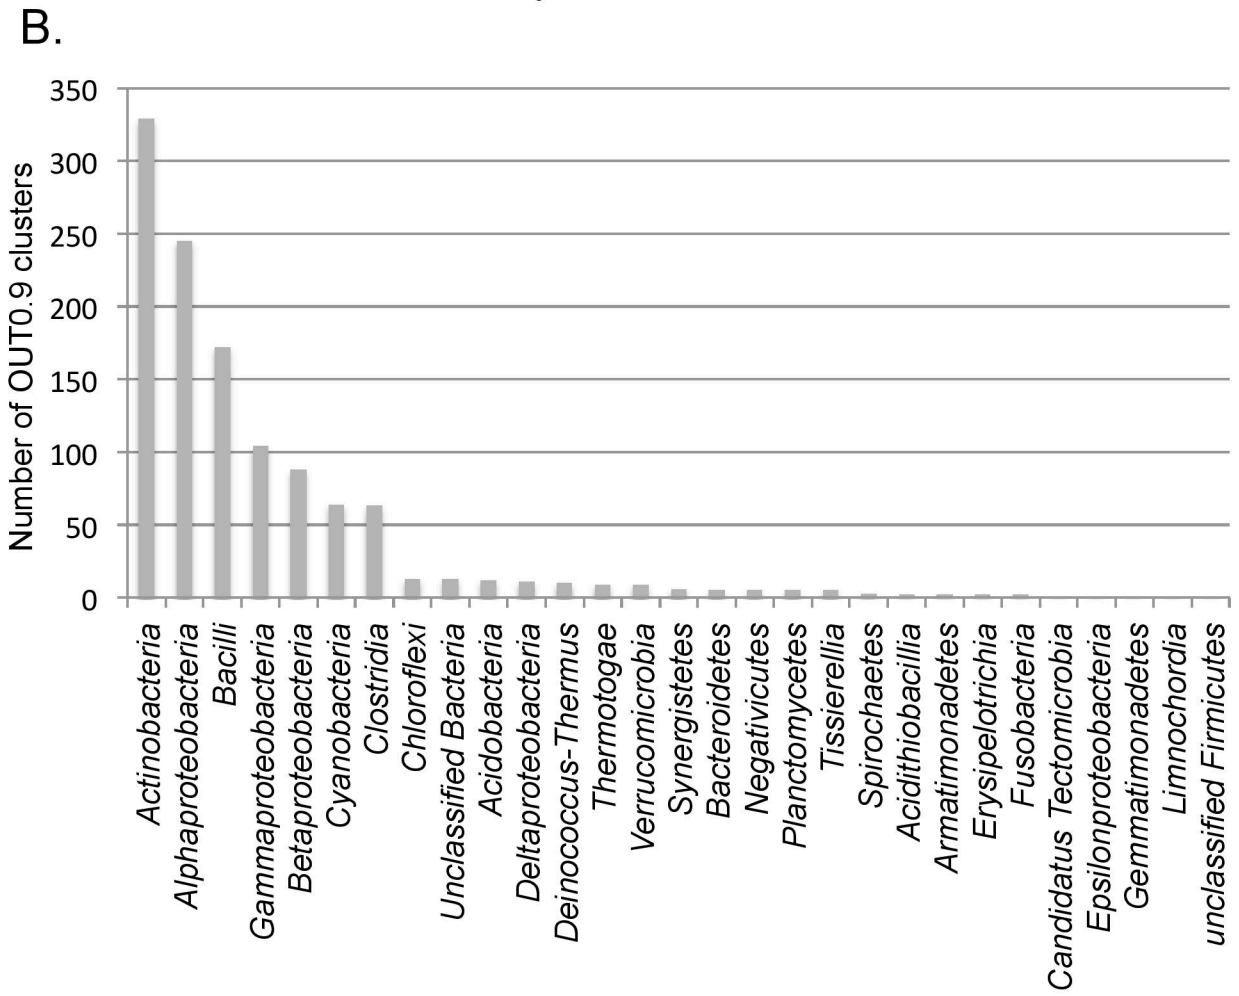

**Figure S8. Maximum likelihood cladogram for Amd/Fmd sequences from *Archaea* and *Bacteria*.** A total of 1323 clusters (OTU0.9) are shown. Clade 1, green lines; Clade II, blue lines; Clade III, red lines; Archaeal sequences within clades, black lines. The eight Amd/Fmd sequences from the Deep Lake haloarchaea are labelled: B9LQ06 (Amd1); B9LQH3 (Amd2); B9LRY7 (Amd3); G2MFV3 (Halar\_0731); G2MKL2 (Halar\_1208); G2MN64 (Halar\_3390); halTADL\_0419; halTADL\_2650. The phylogenetic tree was tested by 1000 bootstraps, and the separation of three clades was supported by a bootstrap value of 0.996.

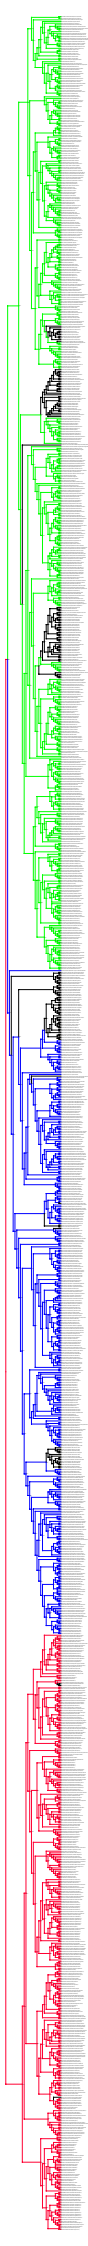

**Figure S9. Maximum likelihood tree constructed from a subsample of equal numbers of Amd/Fmd clusters from *Archaea* and *Bacteria*.** A total of 139 sequences were subsampled from bacterial OTU0.9 clusters to equal the number of archaeal clusters. The three clades root with a bacterial origin, similar to the full trees (Fig. 6 and Fig. S8). Clade 1, green lines; Clade II, blue lines; Clade III, red lines; Archaeal sequences within clades, black lines. Scale represents 1 amino acid variation per aligned position.

Figure S9

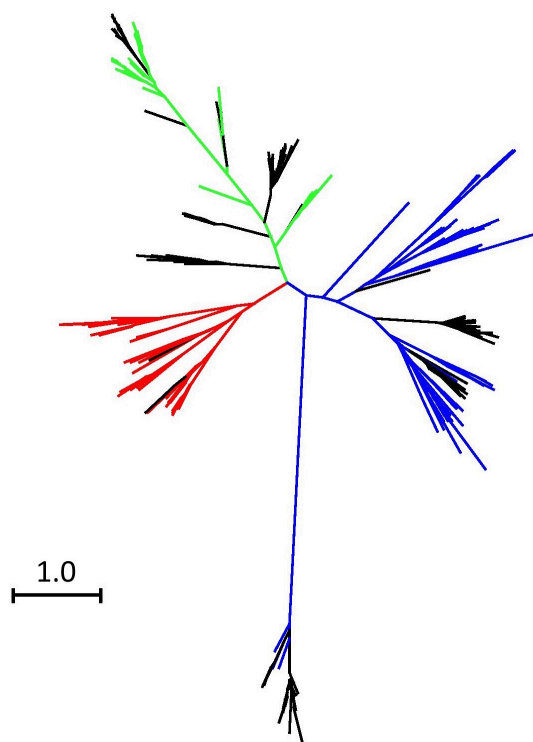

**Figure S10. Number of Amd/Fmd sequences in closed genomes from *Archaea* and *Bacteria*.** A. Average number of Amd/Fmd sequences within genomes that contain Amd/Fmd sequences. B. Average number of Amd/Fmd sequences within genomes of *Archaea* that contain Amd/Fmd sequences, with taxa shown at the class level. C. Average number of Amd/Fmd sequences within genomes of *Bacteria* that contain Amd/Fmd sequences, with taxa shown at the phylum/class level.



Figure S10

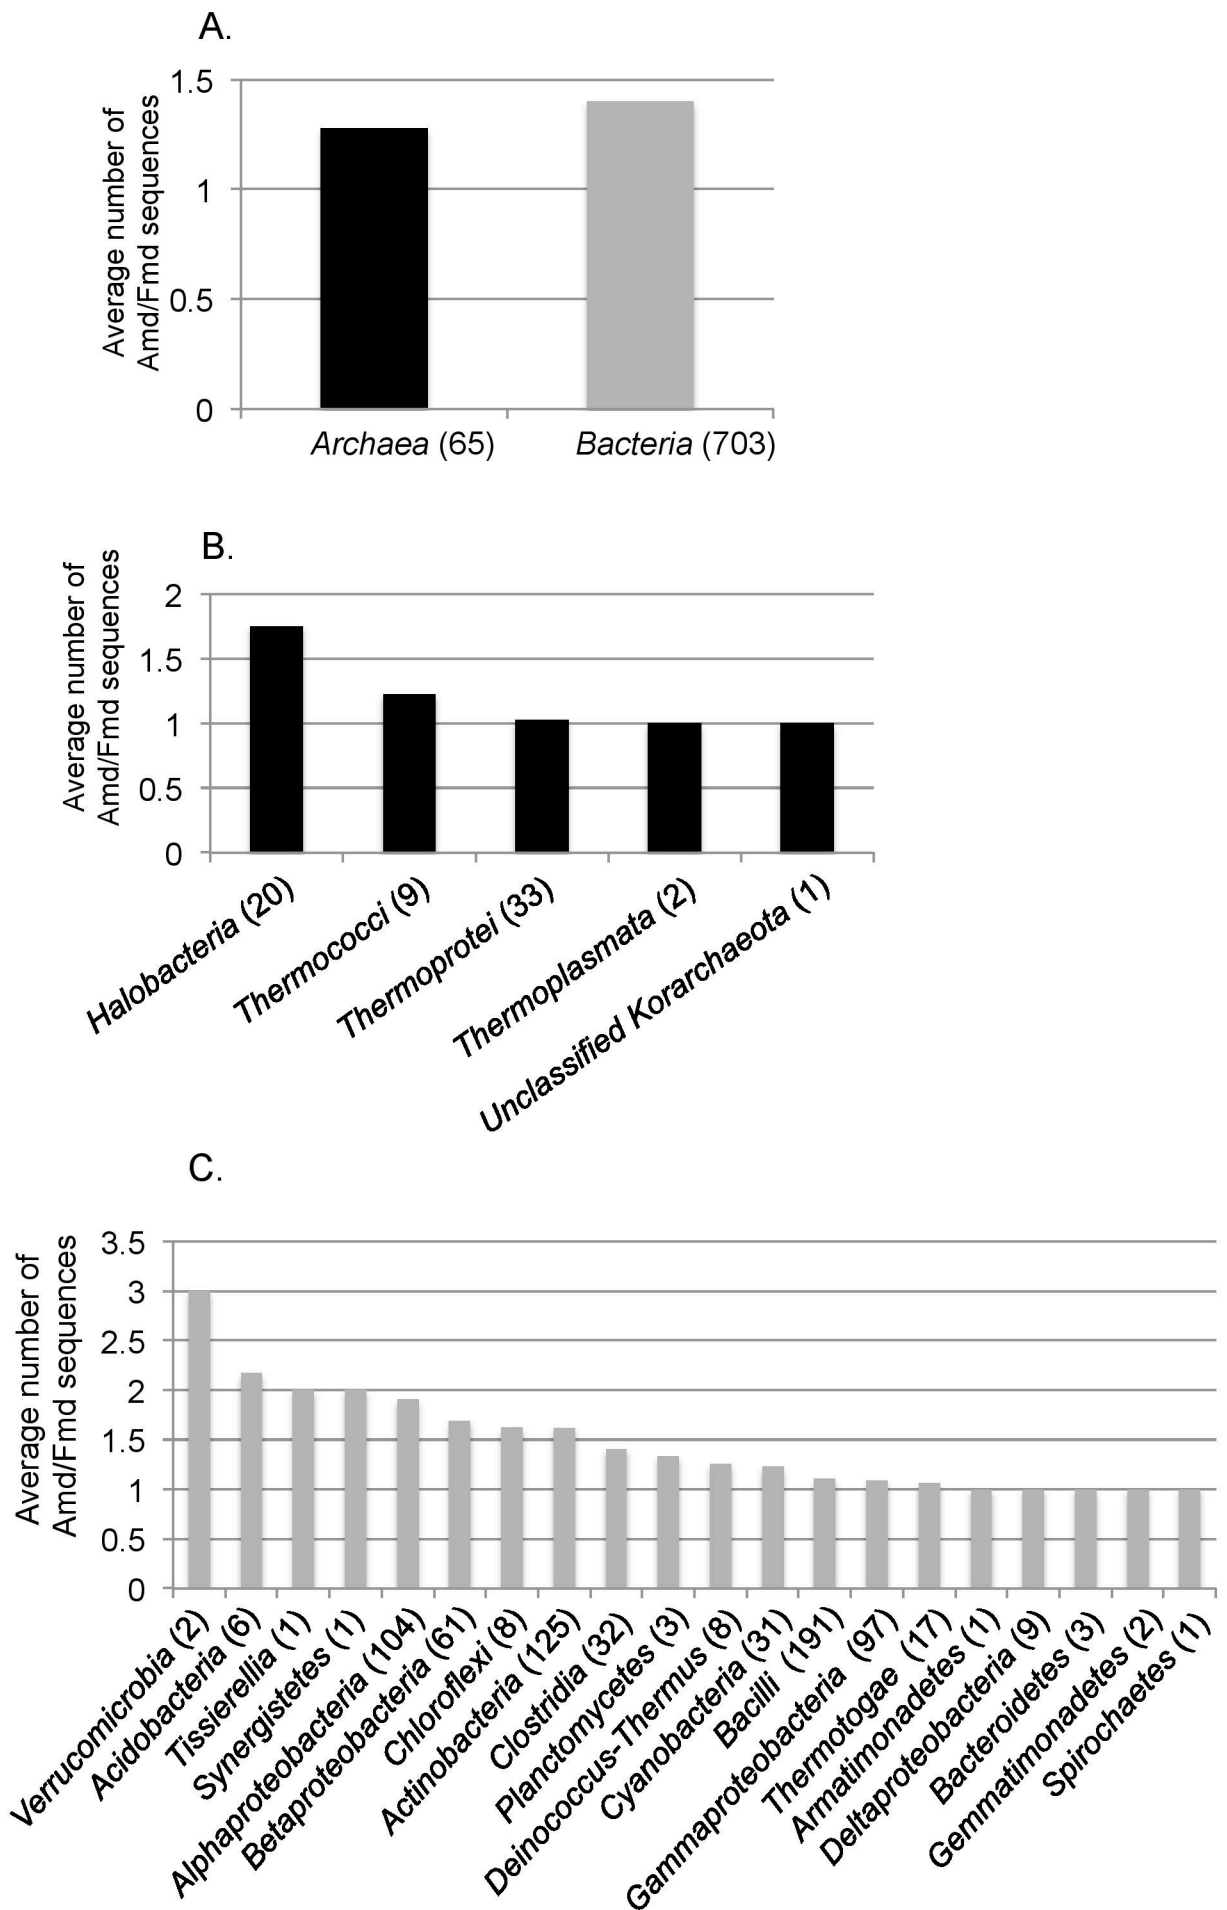

**Figure S11. GC/MS analyses of acetamide.** A. A five point acetamide standard series in the 0 – 20  $\mu\text{g mL}^{-1}$  range fitted with a two point polynomial standard curve. B. GC/MS chromatogram of acetamide standards ( $m/z$  59 ion), showing the typical elution time of ~28 min.

Figure S11

A.

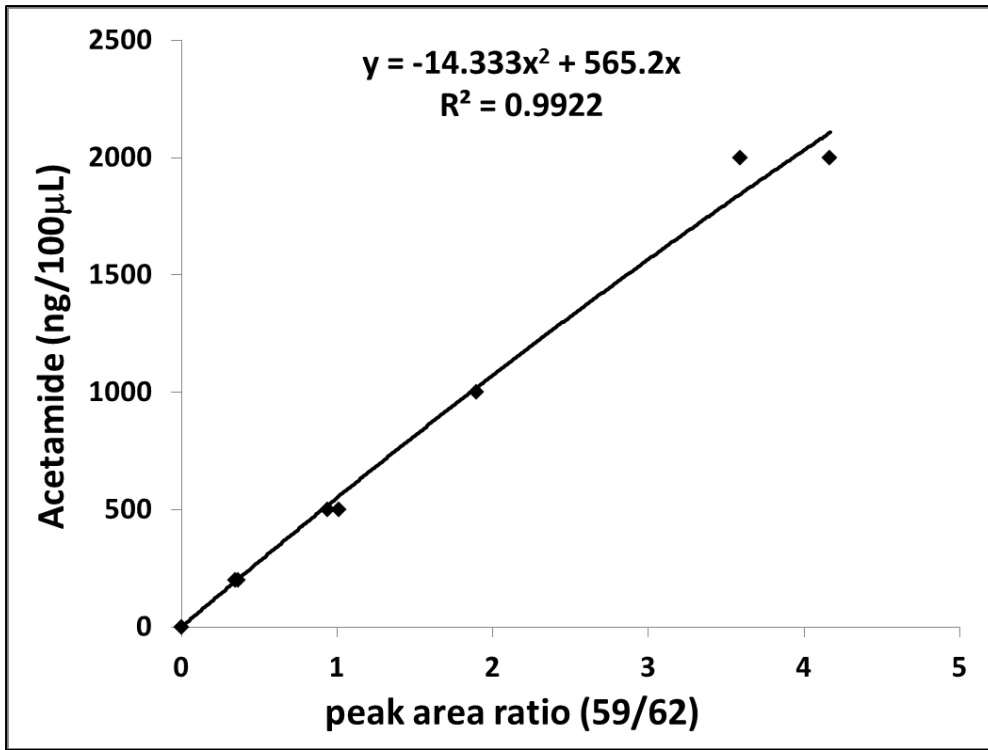

B.

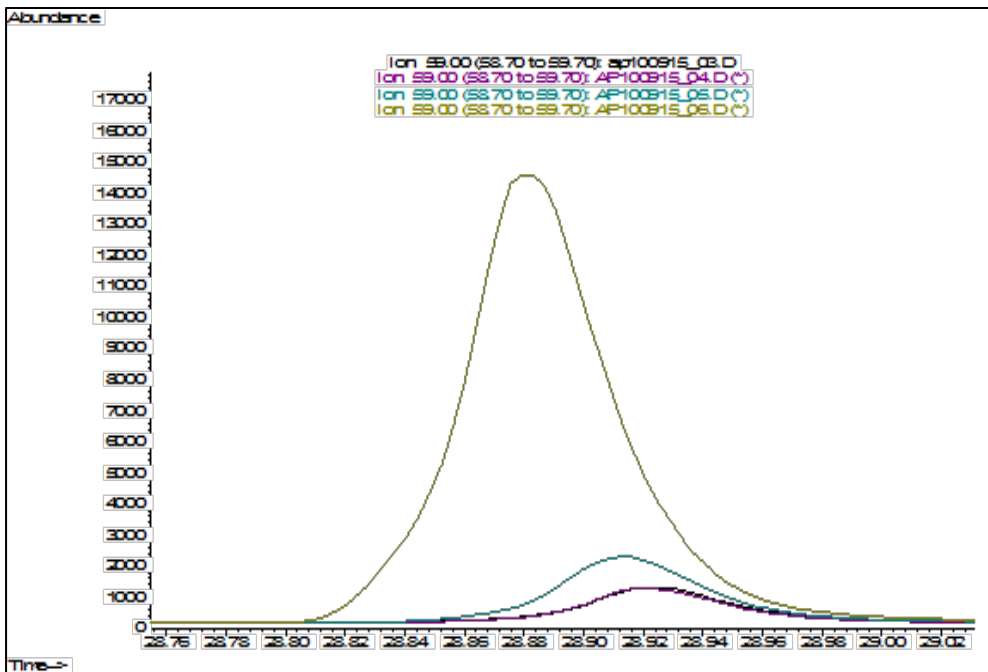

**Table S1. Oligodeoxynucleotide primers used in this study.**

| Primers used for plasmid construction                                               |                                                       |                                      |                                                                                                            |              |
|-------------------------------------------------------------------------------------|-------------------------------------------------------|--------------------------------------|------------------------------------------------------------------------------------------------------------|--------------|
| Primer name                                                                         | Sequence                                              |                                      | Description                                                                                                |              |
| pJ_For                                                                              | GGCGGCCGTTGGAAGAACCGG                                 |                                      | <i>hmgA</i> amplification for creating pJWID1, forward primer                                              |              |
| pJ_For_M                                                                            | GATACTGCAGAACGC <u>TTTA</u> AGGCC<br>GGCGCGGG         |                                      | <i>hmgA</i> amplification for creating pJWID1, mutated forward primer; promoter mutations sites underlined |              |
| pJ_Rev                                                                              | GATACTGCAGTTACCGACCGAGTT<br>CGGCGTGG                  |                                      | <i>hmgA</i> amplification for creating pJWID1, reverse primer                                              |              |
| hmgA_For                                                                            | GCAGGAAAGAACATGCAGAACG                                |                                      | <i>hmgA</i> amplification for creating pTA131_Δ <i>amd3</i> , forward primer                               |              |
| hmgA_Rev                                                                            | CCATGCAGTTACCGACCGAGTT                                |                                      | <i>hmgA</i> amplification for creating pTA131_Δ <i>amd3</i> , reverse primer                               |              |
| Acet_down_For15_h                                                                   | <u>CATGTTCTTTCCTGC</u> CCTCAAGAAG<br>TTCGGCTACA       |                                      | <i>amd3</i> deletion, 15 bp overlap with 5' end of <i>hmgA</i> (underlined)                                |              |
| Acet_down_Rev15                                                                     | <u>GCTTGATATCGAAT</u> TCGGATACGC<br>CTGAATCGTGAG      |                                      | <i>amd3</i> deletion, 15 bp overlap with <i>EcoRI</i> ends of pTA131 (underlined)                          |              |
| Acet_up_For15                                                                       | <u>ACCGCGGTGGCGGCCG</u> CTCGTGGT<br>CGTGGCTGTAGAGGTGG |                                      | <i>amd3</i> deletion, 15 bp overlap with <i>NotI</i> ends of pTA131 (underlined)                           |              |
| Acet_up_Rev15_h                                                                     | <u>TCGGTAACTGCATGGGG</u> CGAGGTA<br>GTGGACTTGCCTGAGG  |                                      | <i>amd3</i> deletion, 15bp overlap with 3' end of <i>hmgA</i>                                              |              |
| pJ_2285_FW                                                                          | <u>GACCTATTGCGCATAT</u> GATGCCAG<br>AAGTCAAATTCGA     |                                      | Complementation, 15 bp overlap with <i>NdeI</i> ends of pJWID1                                             |              |
| pJ_2285_RV                                                                          | <u>CGGGCTGCAGGAAT</u> TCTACTCAA<br>GGGGATCGTC         |                                      | Complementation, 15 bp overlap with <i>EcoRI</i> ends of pJWID1                                            |              |
| Primer used in the PCR assessment for Hlac_2285 gene deletion                       |                                                       |                                      |                                                                                                            |              |
| Primer group-diagnostic purpose                                                     | Primer name                                           | Primer location                      | Sequence                                                                                                   | Product size |
| P1: single recombination, position 1                                                | SR1_For                                               | ColE1 of pTA131                      | ACTACGGCTACACTAGAAGGA                                                                                      | 4036 bp      |
|                                                                                     | SR1_Rev                                               | <i>amd3</i>                          | CGGGAACCACGACATCAA                                                                                         |              |
| P2: single recombination, position 2                                                | SR2_For                                               | <i>amd3</i>                          | TTGATGTCTGGTTCCCG                                                                                          | 2382 bp      |
|                                                                                     | SR2_Rev                                               | ColE1 of pTA131                      | TCCTTCTAGTGTAGCCGTAGT                                                                                      |              |
| P3: double recombination, replacting <i>amd3</i> with <i>hmgA</i> (positive test)   | DRP_For                                               | Chromosome downstream of <i>amd3</i> | CAACCGTCGGATCAGTGAG                                                                                        | 1193 bp      |
|                                                                                     | DRP_Rev                                               | <i>hmgA</i>                          | CGCTTCGAGTTCGTGGAG                                                                                         |              |
| P4. double recombination, replacing <i>amd3</i> with <i>hmgA</i> (negative control) | DRP_For                                               | Chromosome downstream of <i>amd3</i> | CAACCGTCGGATCAGTGAG                                                                                        | 1423 bp      |
|                                                                                     | SR1_Rev                                               | <i>amd3</i>                          | CGGGAACCACGACATCAA                                                                                         |              |

**Table S3. Taxonomic distribution of Amd/Fmd sequences in closed genomes of *Archaea* and *Bacteria*.**

| Taxonomic group                    | Number of genomes | Number of genomes containing Amd/Fmd sequences | Number of Amd/Fmd sequences | Average number of Amd/Fmd sequences in closed genomes containing Amd/Fmd sequences | Average number of Amd/Fmd sequences in all closed genomes |
|------------------------------------|-------------------|------------------------------------------------|-----------------------------|------------------------------------------------------------------------------------|-----------------------------------------------------------|
| <b>Archaea</b>                     |                   |                                                |                             |                                                                                    |                                                           |
| <b>Euryarchaeota</b>               |                   |                                                |                             |                                                                                    |                                                           |
| <i>Halobacteria</i>                | 30                | 20                                             | 35                          | 1.75                                                                               | 1.17                                                      |
| <i>Thermococci</i>                 | 19                | 9                                              | 11                          | 1.22                                                                               | 0.58                                                      |
| <i>Thermoplasmata</i>              | 7                 | 2                                              | 2                           | 1                                                                                  | 0.29                                                      |
| <i>Archaeoglobi</i>                | 7                 | 0                                              | 0                           | -                                                                                  | 0                                                         |
| <i>Methanobacteria</i>             | 13                | 0                                              | 0                           | -                                                                                  | 0                                                         |
| <i>Methanococci</i>                | 15                | 0                                              | 0                           | -                                                                                  | 0                                                         |
| <i>Methanomicrobia</i>             | 47                | 0                                              | 0                           | -                                                                                  | 0                                                         |
| <i>Methanopyri</i>                 | 1                 | 0                                              | 0                           | -                                                                                  | 0                                                         |
| unclassified                       | 3                 | 0                                              | 0                           | -                                                                                  | 0                                                         |
| <b>Korarchaeota</b>                |                   |                                                |                             |                                                                                    |                                                           |
| unclassified                       | 1                 | 1                                              | 1                           | 1                                                                                  | 1                                                         |
| <b>Crenarchaeota</b>               |                   |                                                |                             |                                                                                    |                                                           |
| <i>Thermoprotei</i>                | 58                | 33                                             | 34                          | 1.03                                                                               | 0.59                                                      |
| <b>Thaumarchaeota</b>              |                   |                                                |                             |                                                                                    |                                                           |
| unclassified                       | 12                | 0                                              | 0                           | -                                                                                  | 0                                                         |
| <b>Nanoarchaeota</b>               |                   |                                                |                             |                                                                                    |                                                           |
| unclassified                       | 1                 | 0                                              | 0                           | -                                                                                  | 0                                                         |
| <b>Unclassified Archaea</b>        | 1                 | 0                                              | 0                           | -                                                                                  | 0                                                         |
| <b>Total</b>                       | 215               | 65                                             | 83                          | 1.28                                                                               | 0.39                                                      |
| <b>Bacteria</b>                    |                   |                                                |                             |                                                                                    |                                                           |
| <i>Acidobacteria</i>               | 8                 | 6                                              | 13                          | 2.17                                                                               | 1.63                                                      |
| <i>Actinobacteria</i>              | 425               | 125                                            | 202                         | 1.66                                                                               | 0.49                                                      |
| <i>Aquificae</i>                   | 14                | 0                                              | 0                           | -                                                                                  | 0                                                         |
| <i>Armatimonadetes</i>             | 2                 | 1                                              | 1                           | 1                                                                                  | 0.5                                                       |
| <i>Bacteroidetes</i>               | 138               | 3                                              | 3                           | 1                                                                                  | 0.02                                                      |
| <i>Caldiserica</i>                 | 1                 | 0                                              | 0                           | -                                                                                  | 0                                                         |
| <i>Candidatus Saccharibacteria</i> | 2                 | 0                                              | 0                           | -                                                                                  | 0                                                         |
| <i>Chlamydiae</i>                  | 108               | 0                                              | 0                           | -                                                                                  | 0                                                         |
| <i>Chlorobi</i>                    | 11                | 0                                              | 0                           | -                                                                                  | 0                                                         |
| <i>Chloroflexi</i>                 | 25                | 8                                              | 13                          | 1.7                                                                                | 0.52                                                      |
| <i>Cloacimonetes</i>               | 1                 | 0                                              | 0                           | -                                                                                  | 0                                                         |
| <i>Cyanobacteria</i>               | 91                | 31                                             | 38                          | 1.2                                                                                | 0.42                                                      |
| <i>Deferribacteres</i>             | 4                 | 0                                              | 0                           | -                                                                                  | 0                                                         |

|                              |      |     |     |      |      |
|------------------------------|------|-----|-----|------|------|
| <i>Deinococcus-Thermus</i>   | 21   | 8   | 10  | 1.25 | 0.48 |
| <i>Dictyoglomi</i>           | 2    | 0   | 0   | -    | 0    |
| <i>Elusimicrobia</i>         | 3    | 0   | 0   | -    | 0    |
| <i>Fibrobacteres</i>         | 1    | 0   | 0   | -    | 0    |
| <i>Bacilli</i>               | 703  | 191 | 210 | 1.10 | 0.30 |
| <i>Clostridia</i>            | 178  | 32  | 45  | 1.41 | 0.25 |
| <i>Tissierellia</i>          | 3    | 1   | 2   | 2    | 0.67 |
| <i>Negativicutes</i>         | 8    | 0   | 0   | -    | 0    |
| <i>Erysipelotrichia</i>      | 1    | 0   | 0   | -    | 0    |
| <i>Fusobacteria</i>          | 20   | 0   | 0   | -    | 0    |
| <i>Gemmatimonadetes</i>      | 2    | 2   | 2   | 1    | 1    |
| <i>Kryptonia</i>             | 2    | 0   | 0   | -    | 0    |
| <i>Nitrospirae</i>           | 6    | 0   | 0   | -    | 0    |
| <i>Planctomycetes</i>        | 7    | 3   | 4   | 1.33 | 0.57 |
| <i>Alphaproteobacteria</i>   | 350  | 104 | 198 | 1.90 | 0.57 |
| <i>Betaproteobacteria</i>    | 289  | 61  | 103 | 1.69 | 0.36 |
| <i>Deltaproteobacteria</i>   | 70   | 9   | 9   | 1    | 0.13 |
| <i>Gammaproteobacteria</i>   | 970  | 97  | 105 | 1.08 | 0.11 |
| <i>Epsilonproteobacteria</i> | 155  | 0   | 0   | -    | 0    |
| <i>Spirochaetes</i>          | 82   | 1   | 1   | 1    | 0.01 |
| <i>Synergistetes</i>         | 5    | 1   | 2   | 2    | 0.4  |
| <i>Tenericutes</i>           | 129  | 0   | 0   | -    | 0    |
| <i>Thermodesulfobacteria</i> | 3    | 0   | 0   | -    | 0    |
| <i>Thermotogae</i>           | 23   | 17  | 18  | 1.06 | 0.78 |
| <i>Verrucomicrobia</i>       | 7    | 2   | 6   | 3    | 0.86 |
| Unclassified <i>Bacteria</i> | 2    | 0   | 0   | -    | 0    |
| <b>Total</b>                 | 3872 | 703 | 985 | 1.40 | 0.25 |
